# PDK1 induces JunB, EMT, cell migration and invasion in human gallbladder cancer

Shixian Lian<sup>1,\*</sup>, Yebo Shao<sup>1,\*</sup>, Houbao Liu<sup>1,\*</sup>, Junyi He<sup>1,\*</sup>, Weiqi Lu<sup>1</sup>, Yong Zhang<sup>1</sup>, Ying Jiang<sup>1</sup>, Jun Zhu<sup>1</sup>

<sup>1</sup>Department of General Surgery, Zhongshan Hospital, Fudan University, Shanghai 200032, China

\*These authors have contributed equally to this work

## Correspondence to:

Zhu J., e-mail: zhujun1024@126.com

**Keywords:** 3-phosphoinositide-dependent protein kinase 1, JunB, invasion, migration, epithelial-mesenchymal transition

**Received:** April 20, 2015

**Accepted:** July 23, 2015

**Published:** August 05, 2015

## ABSTRACT

**The protein 3-phosphoinositide-dependent protein kinase 1 (PDK1) is upregulated in cancer. Here we showed that PDK1 stimulated cell proliferation, invasion and metastasis in gallbladder cancer (GBC), by inducing JunB and epithelial-mesenchymal transition. JunB levels were increased in GBC samples and positively correlated with PDK1 levels in tumors. High levels of JunB predicted poor overall survival in GBC patients. Thus, PDK1 functions as a tumor promoter in human GBC by upregulating JunB.**

## INTRODUCTION

Gallbladder cancer (GBC) is the most frequent cancer of the biliary tract and the most common neoplasm of the digestive system [1, 2]. Despite recent progress in diagnostic and therapeutic approaches, its 5-year overall survival (OS) is generally low [3]. The main reason for this is that relatively few patients with GBC are diagnosed prior to surgery [4, 5]. This late diagnosis leads to many GBC cases being unresectable at the time of presentation [6]. The development of new effective early tumor biomarkers would help detect GBC earlier and increase survival rates. The protein 3-phosphoinositide-dependent protein kinase 1 (PDK1) binds to PIP3 and facilitates the colocalization of Akt and PDK1 [7, 8]. Akt plays a key role in the regulation of various physiological processes related to metabolism, growth, proliferation, and survival. A variety of factors influence the cellular distribution of PDK1; for example, binding to soluble inositol phosphates causes PDK1 localization in the cytosol, where many of its non-phosphoinositide-binding substrates reside [9]. PDK1 has been detected in the nucleus as well [10].

PDK1 plays a crucial role in cell growth and metabolism. At the cellular level, PDK1 affects insulin-induced glycogen synthesis, membrane translocation of glucose transporter (GLUT) 4 and synthesis of related proteins, and cell survival [11]. Previous studies have shown that PDK1 may be a viable cancer biomarker [12]. Expression of PDK1 induces anchorage-independent growth *in vitro*, a hallmark of cellular transformation, and

injecting PDK1 cell into nude mice induces homologous, poorly differentiated cells, leading to the formation of breast cancer [13]. PDK1-induced tumorigenesis may result from the inhibition of one or more of its downstream targets, such as Akt or PKC. The PDK1 substrates Akt1, Akt2, and Akt3 are highly expressed in several types of human cancers [14, 15]. Akt2 and PKC- $\alpha$  transform rat fibroblasts *in vitro*; however, no tumorigenesis has been observed [16, 17]. Despite these findings, a direct functional link between PDK1 activation and tumorigenesis has not yet been identified.

Another protein that may influence GBC invasion and metastasis is the transcription factor JunB. The JunB gene was originally discovered as an immediate early growth response gene in mammalian cells. Earlier studies suggested that JunB inhibits cell proliferation and migration by antagonizing c-Jun activity. JunB and c-Jun share extensive homology within the leucine zipper and basic domains, and JunB has been reported to rescue a lethal phenotype in c-Jun-null mice. c-Jun is a strong transcriptional activator, whereas JunB is a modest transactivator and may even repress transcription [18]. Both c-Jun and JunB can be induced in epithelial cells using TGF- $\beta$ , whereas mesenchymal cells respond with the upregulation of JunB but not c-Jun [19]. JunB, together with TGF- $\beta$ , induces epithelial-mesenchymal transition (EMT) and fibrotic responses in mammary and kidney epithelial cells [20].

In this study, we investigated the role of PDK1 in GBC, by evaluating changes in GBC cell morphology

after both increasing and decreasing PDK1 expression via plasmid transfection and siRNA administration, respectively. We also examined the effect of PDK1 levels on JunB expression and on markers of EMT.

## RESULTS

### PDK1 is overexpressed in human GBC

PDK1 levels were measured using quantitative real-time polymerase chain reaction (QRT-PCR) in an expanded cohort of 101 GBC patients. PDK1 was overexpressed in 66 (65.2%) of 101 GBC tissues compared to XX% in the corresponding noncancerous tissues (NCTs) ( $p < 0.001$ , Figures 1A and 1B). Moreover, PDK1 tumor-to-normal expression ratios were associated with the OS of GBC patients ( $p < 0.05$ , Figure 1D). In addition, PDK1 expression was associated with TNM pathological stage ( $p < 0.005$ , Figure 1E). PDK1 expression correlated with lymphatic metastasis. There was no significant association between PDK1 expression in GBC and sex, age, differentiation grade, lymph node status, or distant metastasis (Table 1).

### PDK1 promotes cell invasion and metastasis both *in vitro* and *in vivo*

A consistently high expression of PDK1 in GBC suggests that it contributes to tumorigenesis. In a cell function experiment, we measured the expression of PDK1 in 5 different GBC cell lines using Western blot; both high and low PDK1 expression was found in one cell line each (Supplementary Figure 1A). Subsequently, we constructed a PDK1 overexpression plasmid and siRNA-PDK1 for further studies. Western blot showed that the siRNA-PDK1 successfully decreased PDK1 protein levels (Supplementary Figure 1A); furthermore, after transfection with an overexpression plasmid, the protein levels of PDK1 significantly increased in comparison with the vector plasmid (i.e., the negative control). An *in vitro* proliferation assay revealed that the overexpression of PDK1 increased the growth rate of GBC-SD ( $p < 0.05$ , Supplementary Figure 1B), and a colony formation assay confirmed that PDK1 overexpression promoted the proliferation of GBC-SD cells ( $p < 0.02$ , Supplementary Figure 1B). In contrast, the silencing of PDK1 expression by siRNA reduced the growth of NOZ cells ( $p < 0.05$ , Supplementary Figure 1B).

To determine if PDK1 could modulate the metastatic ability of GBC, we examined the effect of PDK1 on CRC cell invasion using a transwell assay. As shown in Figures 2A and 2B, PDK1-transfected CRC cells exhibited faster invasion and metastasis than the control cells, whereas the silencing of PDK1 suppressed the invasion and metastasis of NOZ cells. We then employed a liver tumor metastasis model using spleen injection of stable

GDC-SD cell lines transfected with PDK1 to monitor their metastatic ability *in vivo*. About 2,500,000 GBC-SD cells were injected into nude mice. Three weeks after inoculation, the total metastasis occurrence number was much higher in the PDK1 overexpression group compared to the vector group (Figure 2C). After injection, we analyzed the dorsal subcutaneous tissues of nude mice that showed stable overexpression or knockdown of PDK1 in GBC-SD cells. Using immunohistochemical (IHC) staining, we found membrane localization of E-cadherin, N-cadherin, Jun B, and PDK1 in mice injected with the control plasmids (Figure 2D). In the PDK1 overexpression group, levels of N-cadherin increased and levels of E-cadherin decreased, compared to the control group. The opposite result was observed in the PDK1 knockdown group. These results suggest that PDK1 is closely associated with EMT markers and that PDK1 upregulation can accelerate GBC cell invasion and metastasis.

### PDK1 promotes cell invasion and metastasis through JunB regulation of EMT

NOZ cells transfected with either the PDK1 overexpression plasmid or the plasmid control remained spindle-shaped; however, cells transfected with si-PDK1 became round in shape (Figure 3A). This suggests that PDK1 may have an effect on EMT. Therefore, we quantified the expression of EMT markers. We used E-cadherin and fibronectin 1 (FN1) as epithelial cell phenotype markers and N-cadherin and V-catenin as mesenchymal cell phenotype markers. Figure 3B shows that E-cadherin and FN1 expression decreased, whereas N-cadherin and V-catenin expression increased, following PDK1 overexpression. To investigate the molecular mechanism by which PDK1 accelerates GBC cell invasion and metastasis, we used the UCSC database (<http://genome.ucsc.edu>) to determine its interaction with transcription factors. We found that transcription factor JunB binds to the DNA consensus sequences ACCAGATGAGTCAT at chr2:173417684–173417697 downstream of the PDK1 gene (Figure 3C). To further evaluate whether JunB is a direct functional target of PDK1 in GBC, we tested JunB expression after transfection with the PDK1 overexpression plasmid and showed that it was upregulated. Moreover, JunB was downregulated when the expression of PDK1 was inhibited by siRNA (Figure 3D). Furthermore, transfection of a JunB overexpression plasmid in GBC cells with siRNA-mediated PDK1 knockdown restored the decrease in E-cadherin and increase in N-cadherin seen following PDK1 overexpression (Figure 3E). IHC staining using anti-PDK1, N-cadherin, JunB, and E-cadherin antibodies in human GBC tumor tissue with high or low PDK1 levels revealed expression patterns similar to those found in cell line and animal model experiments (Figure 3F). Taken together, these data suggest that PDK1 promoted cell

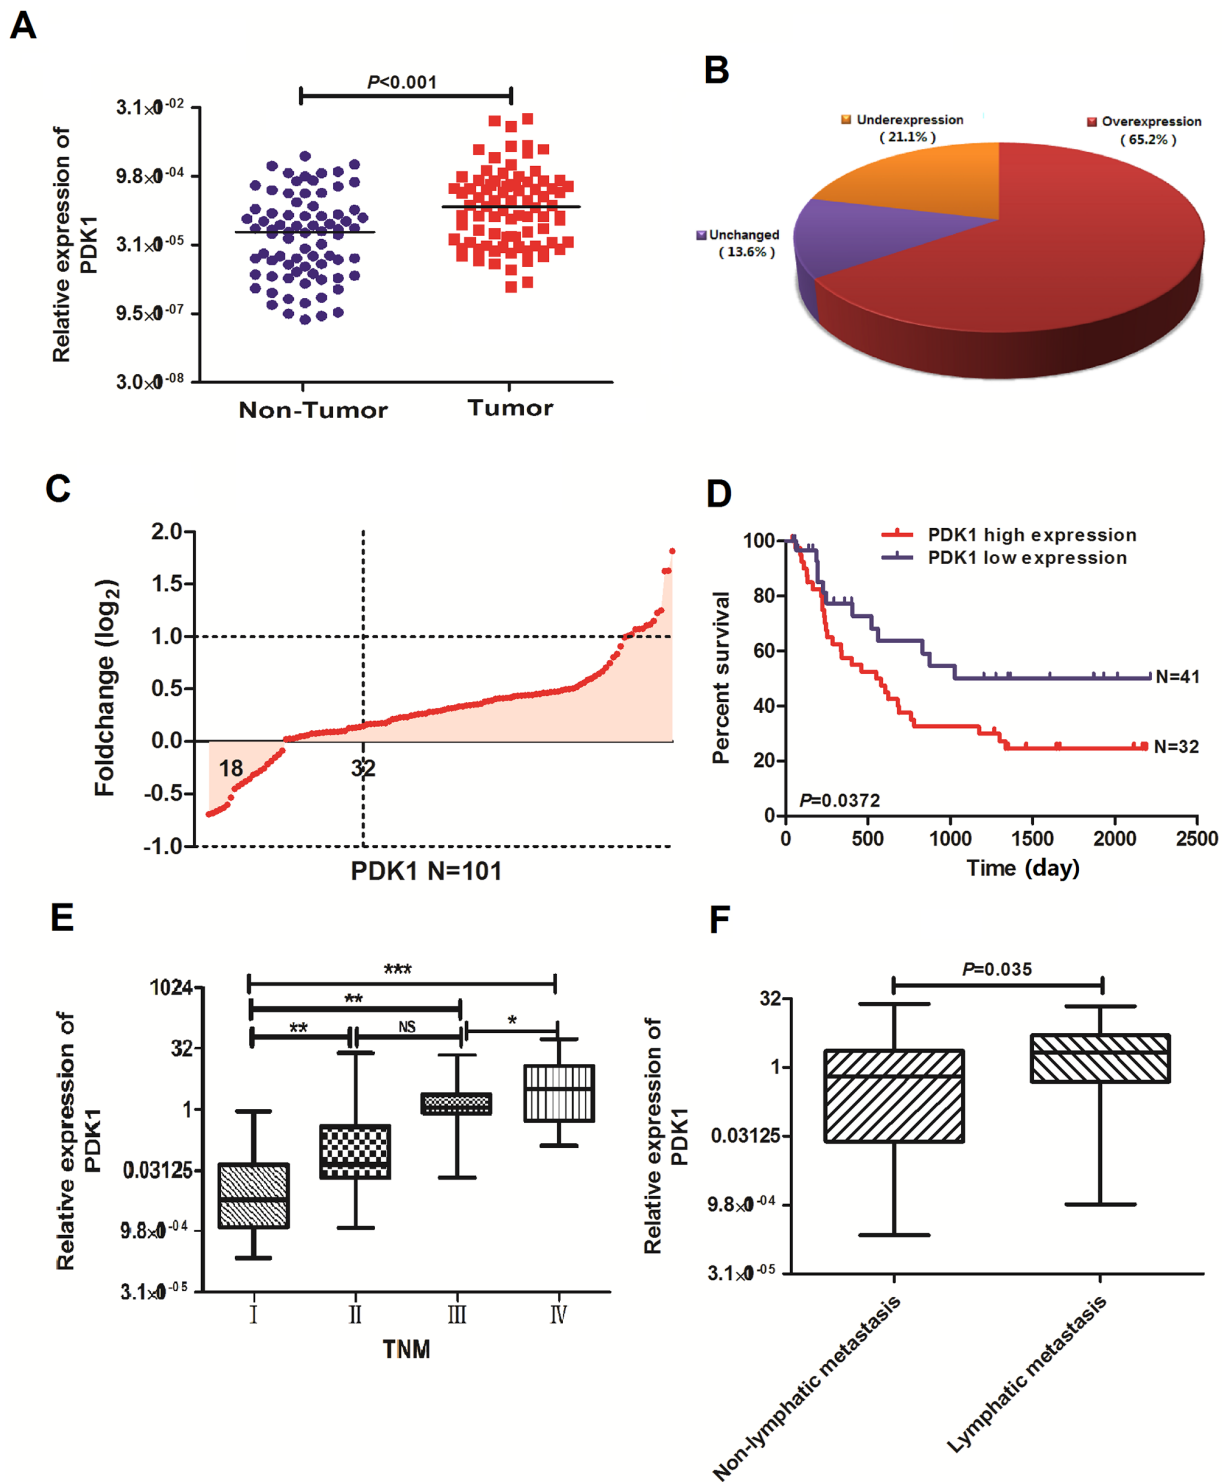

**Figure 1: PDK1 expression is upregulated in GBC.** A. Protein 3-phosphoinositide-dependent protein kinase 1 (PDK1) expression was detected using quantitative real-time polymerase chain reaction (QRT-PCR) in 101 paired gallbladder cancer (GBC) and adjacent noncancerous tissues (NCTs). PDK1 expression was markedly upregulated in tumor tissues relative to the levels in the corresponding NCTs. B. PDK1 expression was upregulated in 65.2%, downregulated in 21.1%, and unchanged in 13.6% of the GBC samples. C. Upregulation of PDK1 in 101 primary GBC relative to the levels in the paired NCTs. D. Overall survival analysis based on the expression level of PDK1 in GBC tissues. E. Overexpression of PDK1 in primary GBCs of advanced stage relative to the levels in GBCs of lower stage. \* $p < 0.05$ , \*\* $p < 0.01$ , \*\*\* $p < 0.001$  F. Overexpression of PDK1 in primary GBCs with lymphatic metastasis relative to the levels in GBCs with nonlymphatic metastasis.

**Table 1: Relationship between PDK1 expression and clinicopathologic factors of patients with gallbladder cancer**

| Parameter              | No. of patients | PDK1(low) | PDK1 (high) | P -value       |
|------------------------|-----------------|-----------|-------------|----------------|
| Sex                    |                 |           |             | 0.2048         |
| male                   | 76              | 29        | 45          |                |
| female                 | 25              | 9         | 16          |                |
| Age (yr)               |                 |           |             | 0.1760         |
| <60                    | 68              | 25        | 33          |                |
| ≥60                    | 33              | 12        | 21          |                |
| Tumor differentiation  |                 |           |             | <b>0.0093</b>  |
| I                      | 6               | 1         | 5           |                |
| II                     | 65              | 18        | 47          |                |
| III                    | 30              | 13        | 17          |                |
| Tumor size (cm)        |                 |           |             | 0.0513         |
| ≤5                     | 61              | 29        | 32          |                |
| >5                     | 59              | 31        | 28          |                |
| Differentiation grade  |                 |           |             | 0.41254        |
| Well-moderate          | 54              | 23        | 31          |                |
| Poor-undifferentiation | 47              | 19        | 28          |                |
| T stage                |                 |           |             | <b>0.03641</b> |
| T1-T3                  | 85              | 26        | 59          |                |
| T4                     | 16              | 5         | 11          |                |
| Lymph node status      |                 |           |             |                |
| Negative               | 56              | 33        | 22          | 0.18390        |
| Positive               | 45              | 16        | 35          |                |
| Distant metastasis     |                 |           |             | 0.2137         |
| M0                     | 59              | 33        | 26          |                |
| M1                     | 42              | 24        | 18          |                |
| TNM stage              |                 |           |             | <b>0.0347</b>  |
| I-II                   | 37              | 17        | 20          |                |
| III-IV                 | 64              | 21        | 43          |                |
| Lymphatic invasion     |                 |           |             | <b>0.035</b>   |
| Negative               | 32              | 13        | 19          |                |
| Positive               | 69              | 24        | 45          |                |
| Venous invasion        |                 |           |             | <b>0.0351</b>  |
| Negative               | 49              | 28        | 21          |                |
| Positive               | 52              | 35        | 17          |                |

\* $P < 0.05$

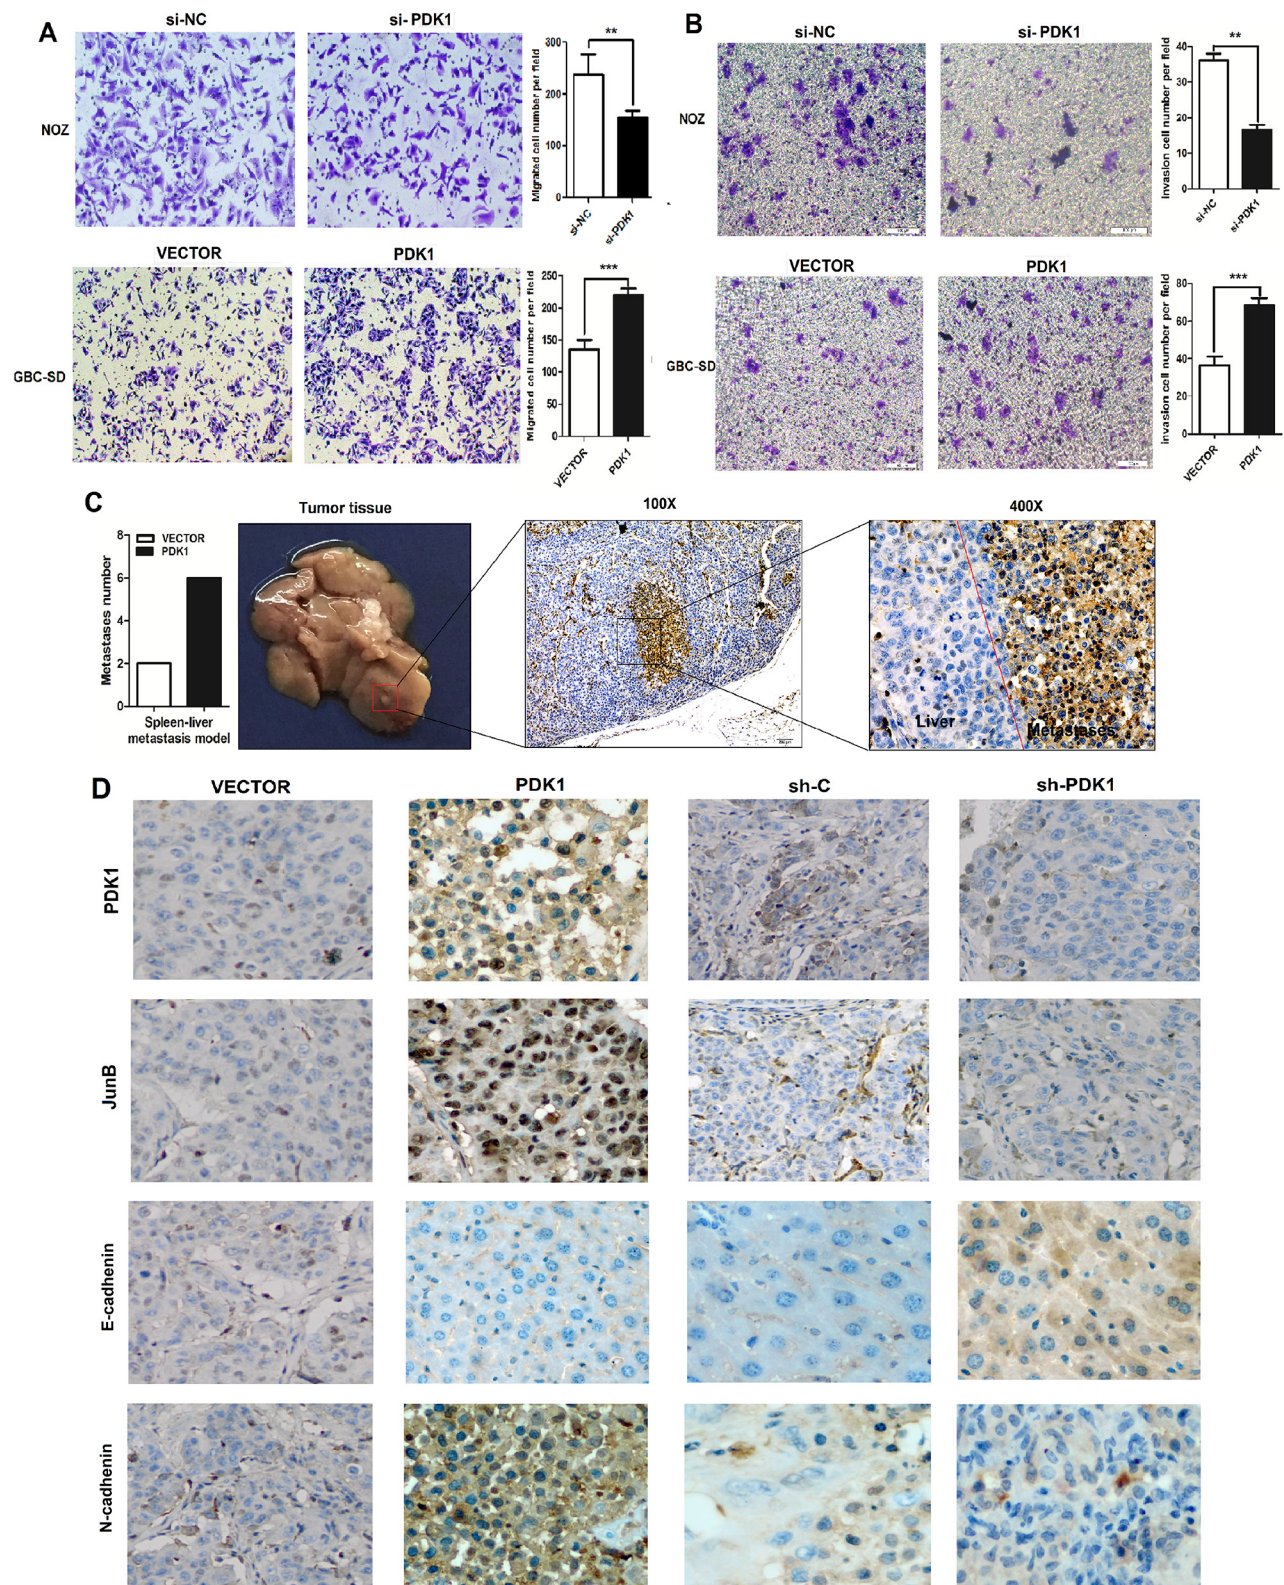

**Figure 2: PDK1 promotes GBC cell invasion and metastasis both *in vitro* and *in vivo*.** **A.** siRNA knockdown of PDK1 in NOZ decreased cell metastasis, whereas overexpression of PDK1 enhanced metastasis in GBC-SD cells. \* $p < 0.05$ , \*\* $p < 0.01$  **B.** siRNA knockdown of PDK1 in NOZ decreased cell invasion, whereas overexpression of PDK1 enhanced invasion of GBC-SD cells. \* $p < 0.05$ , \*\* $p < 0.01$  **C.** The liver metastasis tumor model via spleen injection was employed to evaluate the pro-metastatic role of PDK1 (n = 10 for each group). The total metastasis number of each group is shown in histograms. Right panel: CA19-9 assay of liver metastatic nodule via IHC staining (400 ×). \* $p < 0.05$ , \*\* $p < 0.01$  **D.** Paraffin sections stained with hematoxylin and eosin or used for IHC staining with anti-PDK1, Jun B, E-cadherin, and N-cadherin antibodies.

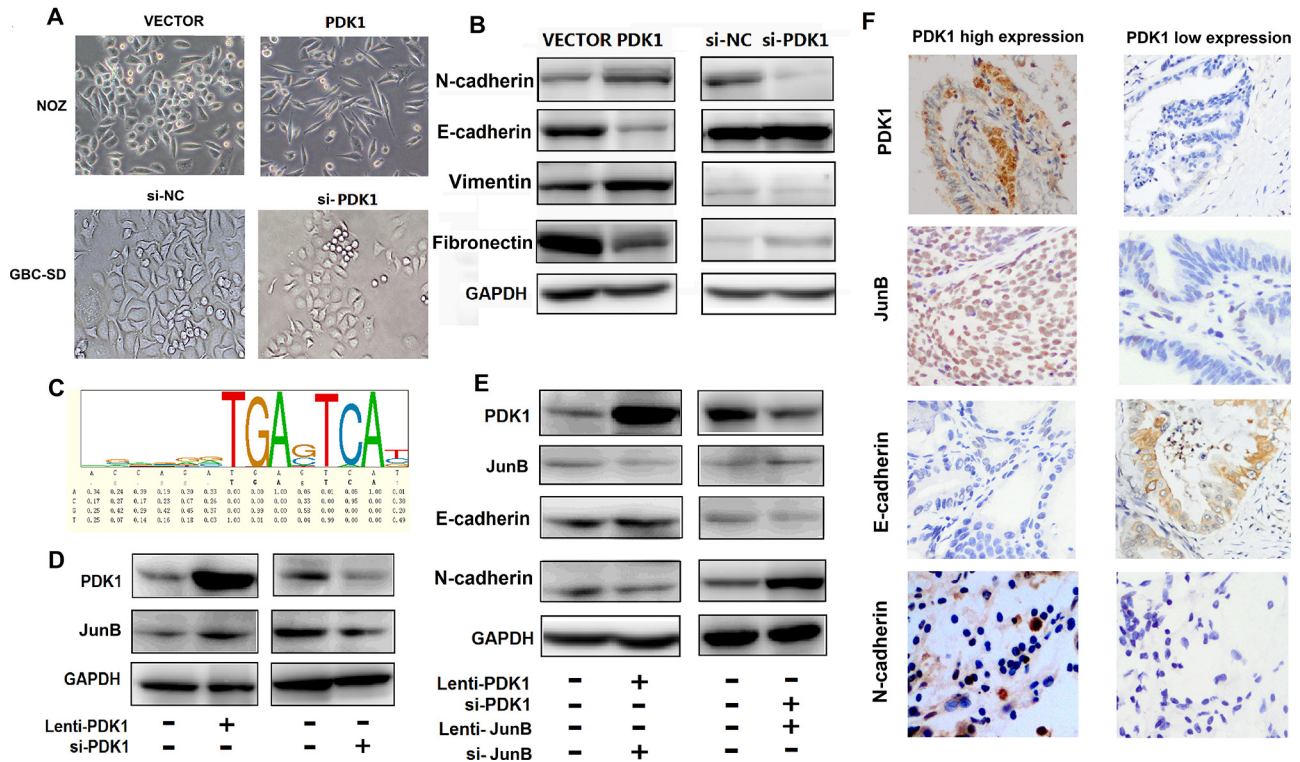

**Figure 3: PDK1 induces JunB, which increases EMT in GBC.** **A.** NOZ cells transfected with PDK1 overexpression plasmid and cells transfected with vector plasmid are spindle shaped; si-PDK1 transfection caused the cells to become round. **B.** The protein levels of E-cadherin, FN1, vimentin and N-cadherin were compared between cells transfected with PDK1 and empty vector. The protein levels of E-cadherin, FN1, vimentin and N-cadherin were compared between cells transfected with si-PDK1 and si-NC. **C.** JunB binds to the DNA consensus sequence ACCAGATGAGTCAT at PDK1 downstream. **D.** JunB was upregulated when PDK1 was over expressed; it was downregulated following siRNA knockdown of PDK1. **E.** The protein levels of E-cadherin and N-cadherin did not change after combined transfection with PDK1 overexpression vector and si-JunB; however, the protein levels of E-cadherin and N-cadherin did after combined transfection with si-PDK1 and JunB overexpression vector. **F.** Representative PDK1, N-cadherin, E-cadherin, and Jun B expression in human GBC tissues with high or low PDK1 levels (400 ×).

invasion and metastasis in GBC through the upregulation of JunB and promotion of EMT.

### PDK1 levels positively correlated with JunB expression and poor prognosis in GBC

To study the relationship between PDK1 and JunB in human GBC, we quantified levels of PDK1 in the 101 paired human GBC and NCT samples using IHC. Compared to the matched NCTs, PDK1 levels were increased in GBC tissue and were positively correlated with JunB levels (Figure 4A). PDK1 was overexpressed in 66.3% (67/101) of GBC tissues compared to XX% of matched NCTs ( $p < 0.05$ , Figure 4B), and protein expression was significantly associated with TNM pathological stage ( $p < 0.05$ , Figure 4C). More importantly, enhanced immunoreactivity of PDK1 and JunB in GBC was inversely correlated with OS and suggested a poor prognosis for CRC patients ( $p < 0.05$ , Figures 4D and 4E). PDK1 expression was positively correlated with JunB levels ( $p < 0.05$ , Figure 4F).

### DISCUSSION

PDK1 plays a key role in the signaling pathways activated by several growth factors and hormones and activates members of the AGC family of protein kinases [21–23]. Changes in the expression and activity of PDK1 and several AGC kinases have been linked to human diseases, including cancer [12, 24, 25]. A recent study found that the upregulation of PDK1 promotes breast cancer oncogenesis, increases breast cancer progression and cell migration, and promotes experimental metastasis [26, 27]. Moreover, PDK1 has been suggested as a viable target in head and neck cancer, multiple myeloma, pancreatic cancer, and colorectal cancer [28–32]. However, the exact function of PDK1 in GBC is largely unknown. Our results indicate that PDK1 is upregulated in GBC. The clinical data of 101 patients with GBC were retrospectively analyzed, and we found that the overexpression of PDK1 was associated with tumor differentiation, T stage, TNM stage, lymphatic invasion, and venous invasion ( $p < 0.05$ ). However, PDK1

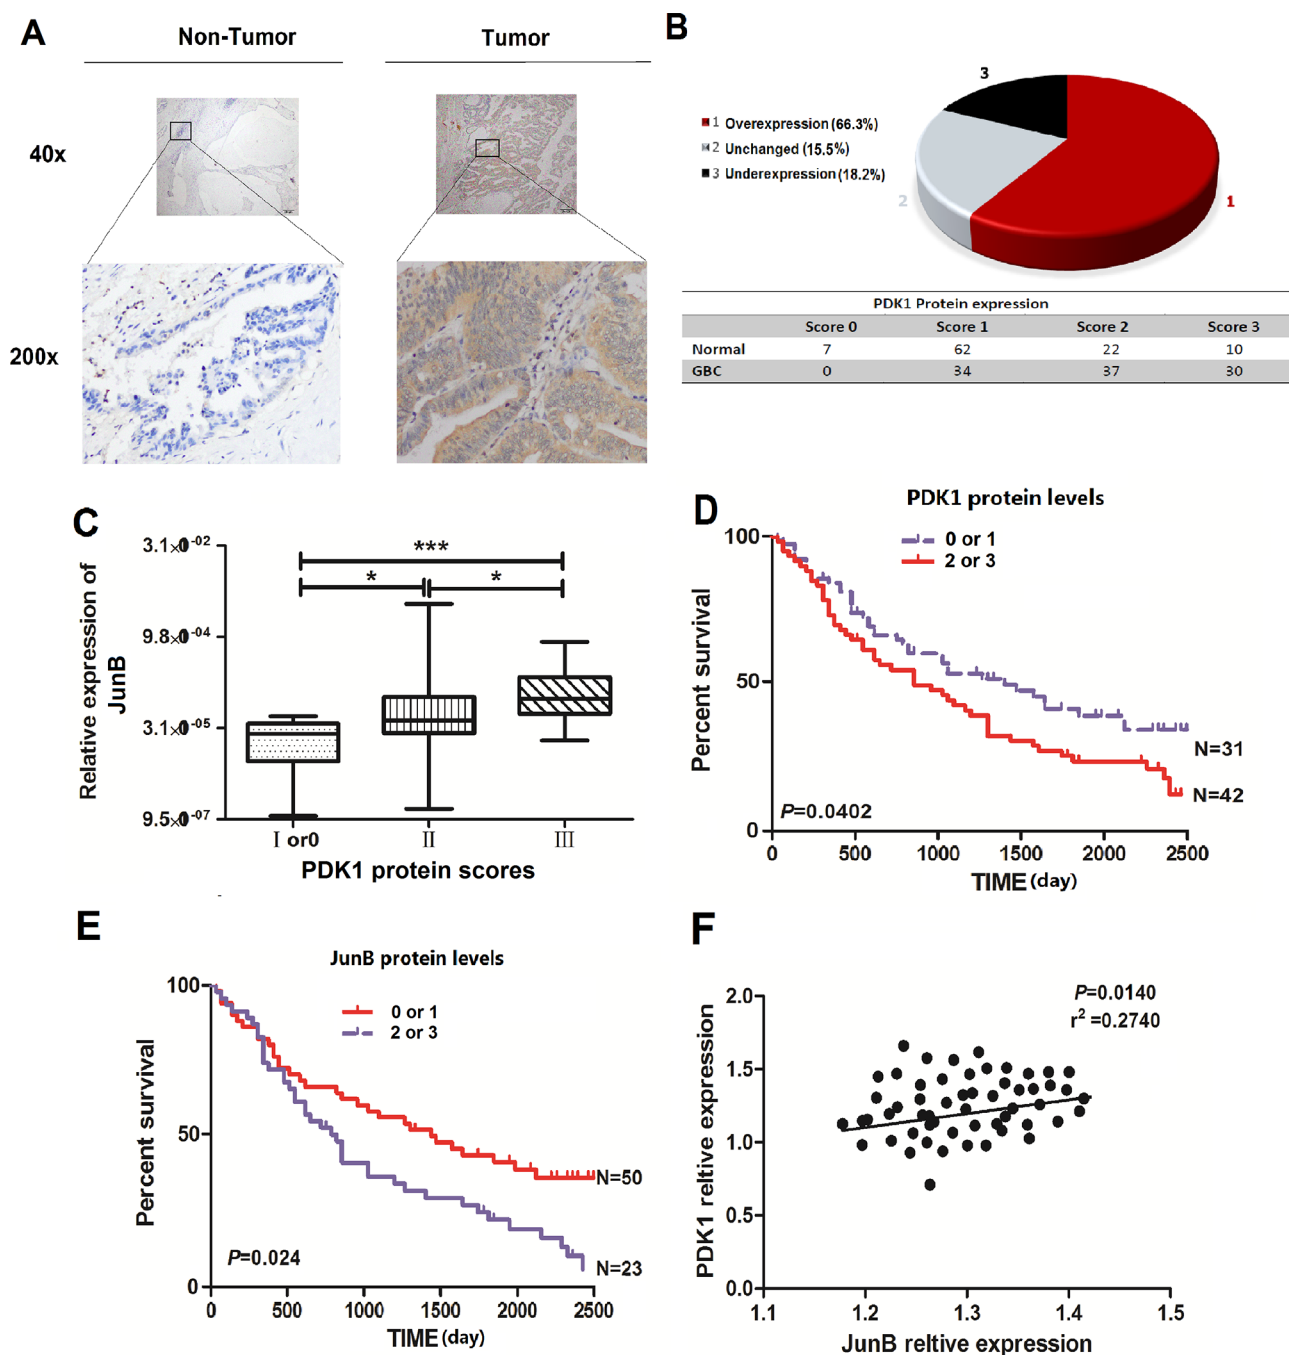

**Figure 4: JunB is overexpressed in GBC and its levels are positively correlated with levels of PDK1.** **A.** Immunohistochemical staining of PDK1 in 101 GBC tumor tissues and the adjacent NCTs. Brown cytoplasmic PDK1 staining was observed in GBC tissues but was nearly absent in the normal epithelia. (original magnification, 40× or 200 ×) **B.** PDK1 is frequently upregulated in tumor tissues ( $n = 101$ ) relative to the expression in matched NCTs, with overexpression in 66.3%, reduced expression in 15.5%, and unchanged expression in 18.2% of the GBC tissues. **C.** Levels of JunB positively correlated with PDK1 levels in GBC tissues.  $*p < 0.05$ ,  $**p < 0.01$  **D.** Overall survival analysis based on the expression level of PDK1. The groups were ranked according to the PDK1 staining intensity. Patients scored as 0 or 1 were included in the low-expression group, whereas those who scored 2 or 3 were included in the high-expression group. The overall survival was significantly higher in patients with low PDK1 expression (score of 0 or 1) than in patients with high PDK1 expression (scores of 2 or 3). **E.** Overall survival analysis based on the expression level of JunB. The groups were ranked according to the JunB staining intensity. Patients who scored 0 or 1 were included in the low-expression group, whereas those who scored 2 or 3 were included in the high-expression group. The overall survival was significantly higher in patients with low JunB expression (score of 0 or 1) than in patients with high JunB expression (score of 2 or 3). **F.** Levels of JunB positively correlated with the PDK1 levels in GBC tissues ( $p = 0.0140$ ,  $r^2 = 0.2740$ ).

overexpression was not significantly associated with tumor size, differentiation grade, lymph node status, age, or sex (Table 1). Univariate and multivariate analyses showed that PDK1 overexpression was significantly associated with differentiation grade, T stage, lymph node status, TNM stage, and lymphatic invasion ( $p < 0.05$ ), but was not significantly associated with sex, age, tumor size, distant metastasis, or venous invasion (Tables 2 and 3). On the basis of these results, we suggest upregulation of PDK1 could be an important carcinogenic factor in GBC. In addition, the results indicate that upregulation of PDK1 is associated with GBC invasion and metastasis. Therefore, we speculate that PDK1 could be an important prognostic marker for GBC. Functional studies have provided the first line of evidence that PDK1 can significantly promote GBC

invasion and metastasis. However, we found that PDK1 was not significantly associated with the proliferation of GBC. Reports have stated that PDK1 can promote cancer cell proliferation through PDK1-Akt/PKB-TSC2-MTORC1 signaling [33].

While investigating the mechanism underlying the promotion of GBC invasion and metastasis by PDK1, we found that GBC cells underwent morphological changes, and we detected increases in EMT marker levels; therefore, we investigated the downstream regulation transcription factors. We found evidence that the JunB transcription factor, the expression of which is affected by PDK1 levels, is a key regulator of GBC. Furthermore, we showed that JunB protein expression decreased following the inhibition of PDK1 expression by siRNA. Moreover,

**Table 2: Univariate analysis identifies factors influencing the overall survival rate of gallbladder cancer patients**

| Factors                      | HR    | 95% CI      | P value       |
|------------------------------|-------|-------------|---------------|
| Sex                          | 0.897 | 1.05–2.57   | 0.389         |
| Age (> 60 vs. ≤ 60)          | 1.462 | 0.701–2.967 | 0.893         |
| Tumor size(cm) > 5           | 5.813 | 5.024–10.54 | 0.0324        |
| Tumor size(cm) < 5           | 3.124 | 1.234–3.002 | 0.0627        |
| Differentiation grade        | 2.341 | 1.689–3.762 | <b>0.0201</b> |
| T stage                      | 1.982 | 1.152–2.641 | <b>0.0031</b> |
| Lymph node status            | 3.124 | 1.10–2.98   | <b>0.046</b>  |
| Distant metastasis           | 2.58  | 0.789–2.315 | 0.452         |
| TNM stage (III vs. II vs. I) | 1.512 | 1.025–3.112 | <b>0.0103</b> |
| Lymphatic invasion           | 1.67  | 1.07–3.024  | <b>0.0071</b> |
| Venous invasion              | 1.87  | 1.10–3.21   | 0.391         |
| PDK1 expression              | 2.76  | 1.85–2.881  | <b>0.0017</b> |

HR: hazard ratio; CI: confidence interval; TNM: tumor–node–metastasis classifications.

**Table 3: Multivariate analysis identifies factors influencing the overall survival rate of gallbladder cancer patients**

| Factors                      | HR    | 95% CI     | P value      |
|------------------------------|-------|------------|--------------|
| Tumor size(cm) > 5 vs. ≤ 5   | 1.96  | 1.31–2.89  | 0.057        |
| Differentiation grade        | 2.13  | 1.02–2.57  | 0.320        |
| T stage                      | 0.89  | 0.64–2.25  | <b>0.01</b>  |
| Lymph node status            | 2.75  | 1.24–3.54  | <b>0.024</b> |
| TNM stage (III vs. II vs. I) | 1.35  | 1.20–1.88  | <b>0.004</b> |
| Lymphatic invasion           | 0.99  | 1.10–3.20  | <b>0.001</b> |
| Venous invasion              | 1.012 | 2.31–3.501 | 0.389        |
| PDK1 expression              | 2.33  | 1.25–3.61  | <b>0.001</b> |

HR: hazard ratio; CI: confidence interval; TNM: tumor–node–metastasis classifications.



we found that overexpression of PDK1 did not alter N-cadherin and E-cadherin levels when JunB expression was inhibited by siRNA. These results were confirmed with an *in vivo* assay. In addition, we used IHC analysis to show that PDK1 was coexpressed with JunB. Therefore, we propose that PDK1 regulates EMT by increasing JunB activity, ultimately promoting GBC invasion and metastasis. The authors of a previous study speculated that JunB may be regulated through TGF- $\beta$ -Smad signaling [20]. The relationships between PDK1, JunB, and TGF- $\beta$ -Smad expression and their effects on GBC will need to be clarified in future studies.

In summary, we determined that PDK1 is frequently upregulated in GBC and is responsible, at least in part, for GBC invasion and metastasis. JunB activity, which is increased following PDK1 upregulation, promotes EMT and likely plays a role in the observed effects of PDK1 overexpression. Based on our findings that PDK1 expression is closely related to the prognosis of GBC, additional studies of PDK1 and JunB as cancer biomarkers are warranted.

## MATERIALS AND METHODS

### Human tissues and cell lines

A total of 101 pairs of human primary GBC and their adjacent NCTs were collected between 2006 and 2012 at the Fudan University Zhongshan Hospital. The tissue samples were immediately snap-frozen in liquid nitrogen and histologically examined in a timely manner. All the human materials were collected after obtaining informed consent, and this study was approved by the Clinical Research Ethics Committee of the Fudan University Zhongshan Hospital. The clinical information of the GBC patients is presented in Table 1. The HEK-293T cell line and 5 human GBC cell lines, including GBC-SD, NT, SGC-996, NOZ, and OCU, were purchased from the American Type Culture Collection (ATCC). All the media (Invitrogen, USA) were supplemented with 10% fetal bovine serum (Gibco, USA). The cells were incubated under the conditions recommended by ATCC.

### DNA and RNA extraction and QRT-PCR

Tissue genomic DNA was isolated using the DNeasy Blood and Tissue kit (Qiagen, German) according to the manufacturer's protocol. Total RNA was extracted using the TRIzol reagent (Invitrogen, USA) according to the manufacturer's instructions. The concentrations of RNA were determined in the samples using a NanoDrop ND-1000 instrument (NanoDrop, USA), and aliquots of the samples were stored at  $-80^{\circ}\text{C}$ . cDNA was synthesized using the PrimeScript RT reagent kit (TaKaRa, Japan) and 500 ng of total RNA as a template. QRT-PCR analyses

were performed to quantitate mRNA relative expression using SYBR Premix Ex Taq (TaKaRa, Japan) with beta-actin as an internal control. The results of QRT-PCR were defined using the threshold cycle (Ct), and relative expression levels were calculated using the  $2^{-\Delta\Delta\text{Ct}}$  method. QRT-PCR was performed using an ABI 7900HT instrument (Applied Biosystems, USA). The primers used for QRT-PCR analysis are listed in the Supplementary Data (Table S1).

### Vector constructs

The open reading frame of the PDK1 and JunB sequences were amplified from normal human genomic DNA using nested PCR and PrimerSTAR Premix (TaKaRa, Japan). The sequence was then cloned into the lentivirus expression vector pWPXL (ThermoFisher, USA) to generate pWPXL-PDK1 and pWPXL-JunB. The primers and endonuclease sites used for the vector constructs are shown in the Supplementary Data (Table S1).

### Lentivirus production and transduction

Virus particles were harvested 48 h after cotransfecting pWPXL-PDK1 and pWPXL-JunB with the packaging plasmid ps-PAX2 and the envelope plasmid pMD2G into HEK-293T cells using Lipofectamine 2000 reagent (Invitrogen, USA). GBC-SD and NOZ cells were infected with recombinant lentivirus-transducing units plus 6  $\mu\text{g}/\text{mL}$  polybrene (Sigma, USA).

### Oligonucleotide transfection

PDK1 and JunB small-interfering RNA (siRNA, target sequence: CAATGGCCCAGGGTGTGATTG AATA;TGGAGGACAAGGTGAAGACGCTCAA) were synthesized (Jinweizhi, China). Oligonucleotide transfection was performed using RNAiMAX reagents (Invitrogen, USA) according to the manufacturer's instructions. The final concentration of the siRNA in the transfection mixture was 50 nM.

### Cell proliferation and colony formation assays

Cell proliferation was quantified using a Cell Counting Kit-8 (CCK8; Dojindo Laboratories, Japan) according to the manufacturer's instructions. For the colony formation assays, 1500 cells/well of GBC-SD cells and 1500 cells/well of NOZ cells were plated into 6-well plates and incubated in a medium containing 10% fetal bovine serum for 10 days. The colonies were fixed with methanol and stained with 0.1% crystal violet in 20% methanol for 30 min. The number of colonies containing more than 30 cells was counted using an inverted microscope.

## Cell migration assay

For the migration assays,  $2 \times 10^5$  GBC-SD cells or  $4 \times 10^4$  NOZ cells (stably expressed pWPXL-PDK1 or vector control) in 200  $\mu$ L serum-free medium were placed into the top chamber of each insert (BD Biosciences, NJ). After 24 (GBC-SD) or 36 (NOZ) h of incubation at 37°C, cells adhering to the lower membrane were stained using 0.1% crystal violet in 20% methanol, imaged, and counted using an IX71 inverted microscope (Olympus, Japan).

## Western blot and immunohistochemical (IHC) analysis

The cells were harvested, and proteins were first separated using 10% sodium dodecyl sulfate polyacrylamide gel electrophoresis and then transferred to nitrocellulose membranes (Bio-Rad Laboratories, USA). The membranes were blocked using 5% nonfat milk and incubated with mouse anti-PDK1 and anti-JunB polyclonal antibodies with a dilution of 1:1000 (CST, USA) or a mouse anti-glyceraldehyde-3-phosphate dehydrogenase (GAPDH) monoclonal antibody with a dilution of 1:1000 (Sigma, USA). The membranes were subsequently incubated using a goat anti-mouse horseradish peroxidase secondary antibody (Sigma, USA). The protein complex was detected using enhanced chemiluminescence reagents (Pierce, France). Endogenous GAPDH was used as the internal control. IHC analysis was performed using PDK1 (Santa Cruz, USA), E-cadherin (Abcam, USA), N-cadherin (Abcam, USA), and Jun B (Abcam, USA) antibodies and previously described methods [34]. Paraffin-embedded samples of GBC were constructed using 101 paired CRC tissues and NCTs. Immunohistochemical staining was performed on 4- $\mu$ m sections of paraffin-embedded tissues to determine the expression level of ARL5A protein. In brief, the slides were incubated in PDK1 and JunB antibody (CST, USA) and diluted 1:500 at 4°C overnight. The subsequent steps were performed using the EnVision™ FLEX High pH visualization system according to the manufacturer's instructions.

## Xenograft tumor model in nude mice

The stable transfected cell line GBC-SD (used in the overexpression group and knockdown group) and the negative control GBC-SD vector were used to perform the experiments in both the subcutaneous xenograft and the liver tumor metastasis models that used spleen injection. In the subcutaneous xenograft tumor model, viable cells ( $2.5 \times 10^6$  in 100  $\mu$ L of phosphate buffered saline [PBS]) were injected subcutaneously into 4 groups (10 mice/group) of 6-week-old nude mice. Four weeks after tumor cell inoculation, the mice were sacrificed and the xenografted tumors were excised and examined by IHC analysis. In the liver tumor metastasis model using spleen injection, the GBC-SD cells were treated as previously

described, and  $1.0 \times 10^6$  cells in 200  $\mu$ L of PBS were then injected into the mouse livers via the spleen. After 5 weeks of incubation, the mice (10 mice/group) were sacrificed and their livers were harvested. Then, serial sections of liver specimens were subjected to hematoxylin and eosin staining to confirm the metastases. The metastases were counted.

## Statistical analyses

The results are presented as the mean values  $\pm$  SEM. The data were subjected to Student's *t*-tests unless otherwise specified ( $\chi^2$  test, Pearson's correlation). The overall survival curves were plotted according to the Kaplan–Meier method, with the log-rank test applied for comparisons. A *p* value of  $< 0.05$  was considered to indicate statistical significance. SPSS 16.0 package (IBM, USA) and Graphpad prism 5.0 software (GraphPad Software, USA) were used for statistical analyses and scientific graphing, respectively.

## ACKNOWLEDGMENTS

This work was supported by the National Natural Science Foundation of China (Grant No. 30972937).

## CONFLICTS OF INTEREST

None.

## REFERENCES

1. Hueman MT, Vollmer Jr CM, Pawlik TM. Evolving treatment strategies for gallbladder cancer. *Annals of Surgical Oncology*. 2009; 16:2101–2115.
2. Dong P, He XW, Gu J, Wu WG, Li ML, Yang JH, Zhang L, Ding QC, Lu JH, Mu JS, Chen L, Li SG, Ding LF: et al. Vimentin significantly promoted gallbladder carcinoma metastasis. *Chinese Medical Journal*. 2011; 124:4236–4244.
3. In Gallstone Disease Diagnosis and Management of Cholelithiasis, Cholecystitis and Choledocholithiasis. 2014; London.
4. Lazcano-Ponce EC, Miquel JF, Muñoz N, Herrero R, Ferrecio C, Wistuba II, Alonso de Ruiz P, Aristi Urista G, Nervi F. Epidemiology and molecular pathology of gallbladder cancer. *A Cancer Journal for Clinicians*. 2001; 51:349–364.
5. Bartlett DL, Fong Y, Fortner JG, Brennan MF, Blumgart LH. Long-term results after resection for gallbladder cancer. Implications for staging and management. *Annals of Surgery*. 1996; 224:639–646.
6. Wistuba II, Gazdar AF. Gallbladder cancer: lessons from a rare tumour. *Nature Reviews Cancer*. 2004; 4:695–706.
7. Bayascas JR. PDK1: the major transducer of PI 3-kinase actions. *Current Topics in Microbiology and Immunology*. 2010; 346:9–29.

8. Mora A, Komander D, van Aalten DM, Alessi DR. PDK1, the master regulator of AGC kinase signal transduction. *Seminars in Cell and Developmental Biology*. 2004; 15:161–170.
9. Komander D, Fairservice A, Deak M, Kular GS, Prescott AR, Peter Downes C, Safrany ST, Alessi DR, van Aalten DM. Structural insights into the regulation of PDK1 by phosphoinositides and inositol phosphates. *EMBO Journal*. 2004; 23:3918–3928.
10. Lim MA, Kikani CK, Wick MJ, Dong LQ. Nuclear translocation of 3'-phosphoinositide-dependent protein kinase 1: a potential regulatory mechanism for PDK-1 function. *Proceedings of the National Academy of Sciences*. 2003; 100:14006–14011.
11. Lembo A, Caradonna L, Magrone T, Mastronardi ML, Caccavo D, Jirillo E, Amati L. *Helicobacter pylori* infection, immune response and vaccination. *Current Drug Targets - Immune, Endocrine & Metabolic Disorders*. 2001; 1:199–208.
12. Bayascas JR, Leslie NR, Parsons R, Fleming S, Alessi DR. Hypomorphic mutation of PDK1 suppresses tumorigenesis in PTEN(+/-) mice. *Current Biology*. 2005; 15:1839–1846.
13. Zeng X, Xu H, Glazer RI. Transformation of mammary epithelial cells by 3-phosphoinositide-dependent protein kinase-1 (PDK1) is associated with the induction of protein kinase Calpha. *Cancer Research*. 2002; 62:3538–3543.
14. Flynn P, Wongdagger M, Zavar M, Dean NM, Stokoe D. Inhibition of PDK-1 activity causes a reduction in cell proliferation and survival. *Current Biology*. 2000; 10:1439–1442.
15. Testa JR, Bellacosa A. AKT plays a central role in tumorigenesis. *Proceedings of the National Academy of Sciences*. 2001; 98:10983–10985.
16. Persons DA, Wilkison WO, Bell RM, Finn OJ. Altered growth regulation and enhanced tumorigenicity of NIH 3T3 fibroblasts transfected with protein kinase C-I cDNA. *Cell*. 1988; 52:447–458.
17. Mende I, Malstrom S, Tschlis PN, Vogt PK, Aoki M. Oncogenic transformation induced by membrane-targeted Akt2 and Akt3. *Oncogene*. 2001; 20:4419–4423.
18. Eferl R, Wagner EF. AP-1: a double-edged sword in tumorigenesis. *Nature Reviews Cancer*. 2003; 3:859–868.
19. Chung KY, Agarwal A, Uitto J, Mauviel A. An AP-1 binding sequence is essential for regulation of the human alpha2(I) collagen (COL1A2) promoter activity by transforming growth factor-beta. *Journal of Biological Chemistry*. 1996; 271:3272–3278.
20. Gervasi M, Bianchi-Smiraglia A, Cummings M, Zheng Q, Wang D, Liu S, Bakin AV. JunB contributes to Id2 repression and the epithelial-mesenchymal transition in response to transforming growth factor-beta. *Journal of Cell Biology*. 2012; 196:589–603.
21. Bellacosa A, Franke TF, Gonzalez-Portal ME, Datta K, Taguchi T, Gardner J, Cheng JQ, Testa JR, Tschlis PN. Structure, expression and chromosomal mapping of c-akt: relationship to v-akt and its implications. *Oncogene*. 1993; 8:745–754.
22. Bellacosa A, Testa JR, Staal SP, Tschlis PN. A retroviral oncogene, akt, encoding a serine-threonine kinase containing an SH2-like region. *Science*. 1991; 254:274–277.
23. Pearce LR, Komander D, Alessi DR. The nuts and bolts of AGC protein kinases. *Nature Reviews Molecular Cell Biology*. 2010; 11:9–22.
24. Chan CH, Jo U, Kohrman A, Rezaeian AH, Chou PC, Logothetis C, Lin HK. Posttranslational regulation of Akt in human cancer. *Cell & Bioscience*. 2014; 4:59.
25. Wu YH, Chang TH, Huang YF, Chen CC, Chou CY. COL11A1 confers chemoresistance on ovarian cancer cells through the activation of Akt/c/EBPβ pathway and PDK1 stabilization. *Oncotarget*. 2015.
26. Fyffe C, Falasca M. 3-Phosphoinositide-dependent protein kinase-1 as an emerging target in the management of breast cancer. *Cancer Management and Research*. 2013; 5:271–280.
27. Xiang L, Gilkes DM, Hu H, Luo W, Bullen JW, Liang H, Semenza GL. HIF-1α and TAZ serve as reciprocal co-activators in human breast cancer cells. *Oncotarget*. 2015; 6:11768–11778.
28. Pearn L, Fisher J, Burnett AK, Darley RL. The role of PKC and PDK1 in monocyte lineage specification by Ras. *Blood*. 2007; 109:4461–4469.
29. Bhola NE, Freilino ML, Joyce SC, Sen M, Thomas SM, Sahu A, Cassell A, Chen CS, Grandis JR. Antitumor mechanisms of targeting the PDK1 pathway in head and neck cancer. *Molecular Cancer Therapeutics*. 2012; 11:1236–1246.
30. Fujiwara S, Kawano Y, Yuki H, Okuno Y, Nosaka K, Mitsuya H, Hata H. PDK1 inhibition is a novel therapeutic target in multiple myeloma. *British Journal of Cancer*. 2013; 108:170–178.
31. Eser S, Reiff N, Messer M, Seidler B, Gottschalk K, Dobler M, Hieber M, Arbeiter A, Klein S, Kong B, Michalski CW, Schlitter AM, Esposito I, et al. Selective requirement of PI3K/PDK1 signaling for Kras oncogene-driven pancreatic cell plasticity and cancer. *Cancer Cell*. 2013; 23:406–420.
32. Tan J, Lee PL, Li Z, Jiang X, Lim YC, Hooi SC, Yu Q. B55beta-associated PP2A complex controls PDK1-directed myc signaling and modulates rapamycin sensitivity in colorectal cancer. *Cancer Cell*. 2010; 18:459–471.
33. Wang X, Johnson GA, Burghardt RC, Wu G, Bazer FW. Uterine histotroph and conceptus development. I. cooperative effects of arginine and secreted phosphoprotein 1 on proliferation of ovine trophoblast cells via activation of the PDK1-Akt/PKB-TSC2-MTORC1 signaling cascade. *Biology of Reproduction*. 2015; 92:51.
34. Harbhajanka A, Lamzabi I, Jain R, Gattuso P, Kluskens L. Cytomorphology and immunohistochemistry of a recurrent clear cell odontogenic carcinoma with molecular analysis: A case report with review of literature. *Diagnostic Cytopathology*. 2015.
